# Supplementary material
Source: PubMed Central journal article supplement (PMC3346462)
Supplement: supp_78.9.3114_AEM-AEM07506-11-s01.pdf [file supp_78.9.3114_AEM-AEM07506-11-s01.pdf]

1 **Supplementary data**

2

3 *List of primers used for cloning*

4

5 CSN\_pET\_for: 5'TCAGAATTCGGCTGCAAAGGAAATGAAACCATTTC3'

6 CSN\_pET\_rev: 5'GTCAAGCTTATTATCGTATCCTTCATAGATTG3'

7 CSN\_StrepII\_for: 5'CCCCATATGTGGTCACATCCTCAATTTGAAAAAGATATCGGAATTAA

8 TTCGGATCC3'

9 CSN\_StrepII\_rev: 5'CCCAAGCTTTTAATTATCGTATCCTTCATAGATTGC3'

10

11 eGFP\_for: 5'CCCAAGCTTGTGAGCAAGGGCGAGGAG3'

12 eGFP\_rev: 5'CCGCTCGAGCTTGTACAGCTCGTCCATGC 3'

13

14 CSN\_E122Q\_for: 5'TGAAGTTCCAAGTGGCTTAAACCC3'

15 CSN\_E122Q\_rev: 5'CAAGGTCAAGGGTATGGGATGATAATTACAG3'

16 wherein both the primers were phosphorylated at the 5'-end

17
